# Supplementary material for: Synthesis, Structure and Antibacterial Activity of Two Novel Coordination Polymers Based on N,N′-bis(4-carbozvlbenzvl)-4-aminotoluene and Heterocyclic Ligand against S. aureus
Source: MDPI journal article supplement (doi:10.3390/molecules29091990), 2024-04-26
Supplement: s1 [file s1]

# Synthesis, Structure and Antibacterial Activity of Two Novel Coordination Polymers Based on *N,N'*-bis(4-carbozvlbenzvl)-4-aminotoluene and Heterocyclic Ligand against *S. aureus*

Ziyun Wang, Lun Zhao \*, Hongwei Jing, Guanying Song and Jiayu Li

College of Chemistry, Changchun Normal University, Changchun 130032, China;

qx202200053@stu.ccsfu.edu.cn (Z.W.); qx202100047@stu.ccsfu.edu.cn (H.J.);

qx202100049@stu.ccsfu.edu.cn (G.S.); lijiaayu@stu.ccsfu.edu.cn (J.L.)

\* Correspondence: zhaolun7511@126.com; Tel.: +86-431-86168903

Table S1. Selected Bond Lengths (Å) and Angles (deg) for **1** and **2**

| Compound 1                                                         |           |                     |           |
|--------------------------------------------------------------------|-----------|---------------------|-----------|
| O(3)-Cd(1)#4                                                       | 2.379(9)  | Cd(2)-O(5)          | 2.367(9)  |
| O(4)-Cd(1)#4                                                       | 2.379(8)  | Cd(2)-N(8)#2        | 2.371(9)  |
| O(7)-Cd(1)#4                                                       | 2.222(10) | Cd(2)-O(6)          | 2.394(7)  |
| O(8)-Cd(2)#4                                                       | 2.246(9)  | Cd(1)-O(7)#1        | 2.222(10) |
| N(4)-Cd(1)#2                                                       | 2.332(10) | Cd(1)-O(1)          | 2.301(9)  |
| N(8)-Cd(2)#3                                                       | 2.371(9)  | Cd(1)-N(1)          | 2.330(10) |
| Cd(2)-O(2)                                                         | 2.220(10) | Cd(1)-N(4)#3        | 2.332(10) |
| Cd(2)-O(8)#1                                                       | 2.246(9)  | Cd(1)-O(3)#1        | 2.379(9)  |
| Cd(2)-N(5)                                                         | 2.255(11) | Cd(1)-O(4)#1        | 2.379(8)  |
| O(2)-Cd(2)-O(8)#1                                                  | 102.8(3)  | O(7)#1-Cd(1)-O(1)   | 102.9(3)  |
| O(2)-Cd(2)-N(5)                                                    | 96.6(4)   | O(7)#1-Cd(1)-N(1)   | 99.0(4)   |
| O(8)#1-Cd(2)-N(5)                                                  | 95.5(4)   | O(1)-Cd(1)-N(1)     | 96.0(3)   |
| O(2)-Cd(2)-O(5)                                                    | 96.0(3)   | O(7)#1-Cd(1)-N(4)#3 | 90.6(4)   |
| O(8)#1-Cd(2)-O(5)                                                  | 158.6(3)  | O(1)-Cd(1)-N(4)#3   | 82.1(3)   |
| N(5)-Cd(2)-O(5)                                                    | 92.4(4)   | N(1)-Cd(1)-N(4)#3   | 170.4(4)  |
| O(2)-Cd(2)-N(8)#2                                                  | 90.4(3)   | O(7)#1-Cd(1)-O(3)#1 | 154.3(3)  |
| O(8)#1-Cd(2)-N(8)#2                                                | 83.3(3)   | O(1)-Cd(1)-O(3)#1   | 101.8(3)  |
| N(5)-Cd(2)-N(8)#2                                                  | 172.9(4)  | N(1)-Cd(1)-O(3)#1   | 85.4(3)   |
| O(5)-Cd(2)-N(8)#2                                                  | 86.5(3)   | N(4)#3-Cd(1)-O(3)#1 | 85.8(3)   |
| O(2)-Cd(2)-O(6)                                                    | 151.0(3)  | O(7)#1-Cd(1)-O(4)#1 | 98.1(3)   |
| O(8)#1-Cd(2)-O(6)                                                  | 105.5(3)  | O(1)-Cd(1)-O(4)#1   | 156.4(3)  |
| N(5)-Cd(2)-O(6)                                                    | 86.8(4)   | N(1)-Cd(1)-O(4)#1   | 91.2(3)   |
| O(5)-Cd(2)-O(6)                                                    | 55.1(3)   | N(4)#3-Cd(1)-O(4)#1 | 87.0(3)   |
| N(8)#2-Cd(2)-O(6)                                                  | 86.8(3)   | O(3)#1-Cd(1)-O(4)#1 | 56.3(3)   |
| Symmetry codes: #1 x,y,z+1; #2 x-1,y,z-1; #3 x+1,y,z+1; #4 x,y,z-1 |           |                     |           |
| Compound 2                                                         |           |                     |           |
| Ni(1)-N(2)                                                         | 2.016(5)  | Ni(1)-O(1)          | 2.167(4)  |
| Ni(1)-O(3)                                                         | 2.045(3)  | Ni(1)-O(4)          | 2.175(4)  |
| Ni(1)-N(5)#1                                                       | 2.059(4)  | N(5)-Ni(1)#2        | 2.059(4)  |

|                                                                                      |            |                   |            |
|--------------------------------------------------------------------------------------|------------|-------------------|------------|
| Ni(1)-O(2)                                                                           | 2.066(3)   |                   |            |
| O(3)-Ni(1)-O(4)                                                                      | 62.00(13)  | N(5)#1-Ni(1)-O(2) | 99.63(15)  |
| N(5)#1-Ni(1)-O(4)                                                                    | 158.85(15) | N(2)-Ni(1)-O(1)   | 156.26(16) |
| O(2)-Ni(1)-O(4)                                                                      | 99.82(14)  | O(3)-Ni(1)-O(1)   | 104.01(14) |
| O(1)-Ni(1)-O(4)                                                                      | 89.71(15)  | N(5)#1-Ni(1)-O(1) | 92.02(15)  |
| N(2)-Ni(1)-O(3)                                                                      | 97.66(16)  | O(2)-Ni(1)-O(1)   | 62.29(14)  |
| N(2)-Ni(1)-N(5)#1                                                                    | 94.81(18)  | N(2)-Ni(1)-O(4)   | 92.00(17)  |
| O(3)-Ni(1)-N(5)#1                                                                    | 97.20(15)  | O(3)-Ni(1)-O(2)   | 158.53(13) |
| N(2)-Ni(1)-O(2)                                                                      | 94.12(16)  |                   |            |
| Symmetry codes: #1 x,y,z+1; #2 x,y,z-1; #3 x+3/4,-y+1/4,z-1/4; #4 x-3/4,-y+1/4,z+1/4 |            |                   |            |

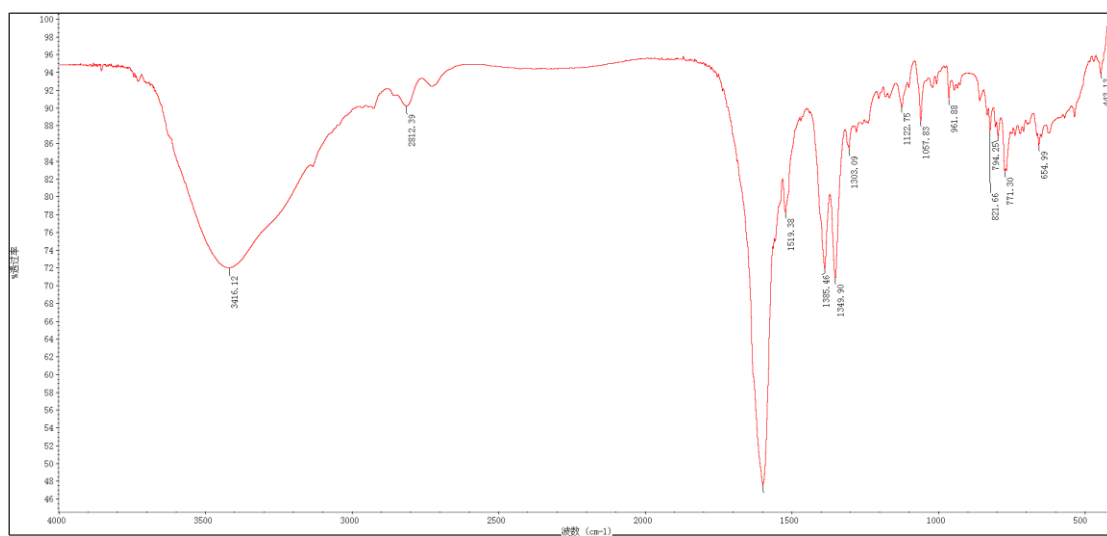

Figure S1. IR spectra of Compound 1.

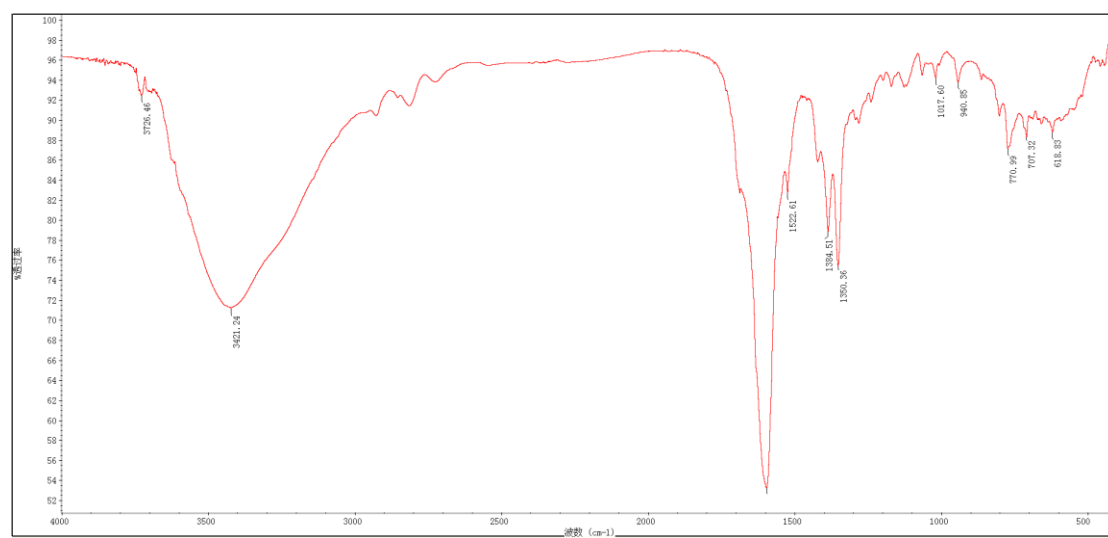

Figure S2. IR spectra of Compound 2.
